# Supplementary material for: PAK1 contributes to cerebral ischemia/reperfusion injury by regulating the blood-brain barrier integrity
Source: PubMed Central journal article supplement — iScience. 2023 Jul 11;26(8):107333. doi: 10.1016/j.isci.2023.107333 (PMC10387573; doi:10.1016/j.isci.2023.107333), 2023-07-11
Supplement: mmc1.pdf [file mmc1.pdf]

iScience, Volume 26

## **Supplemental information**

**PAK1 contributes to cerebral  
ischemia/reperfusion injury by regulating  
the blood-brain barrier integrity**

**Ming Huang, Jinshun Zhang, Mengwei Li, Haowei Cao, Qiuju Zhu, and Dejun Yang**

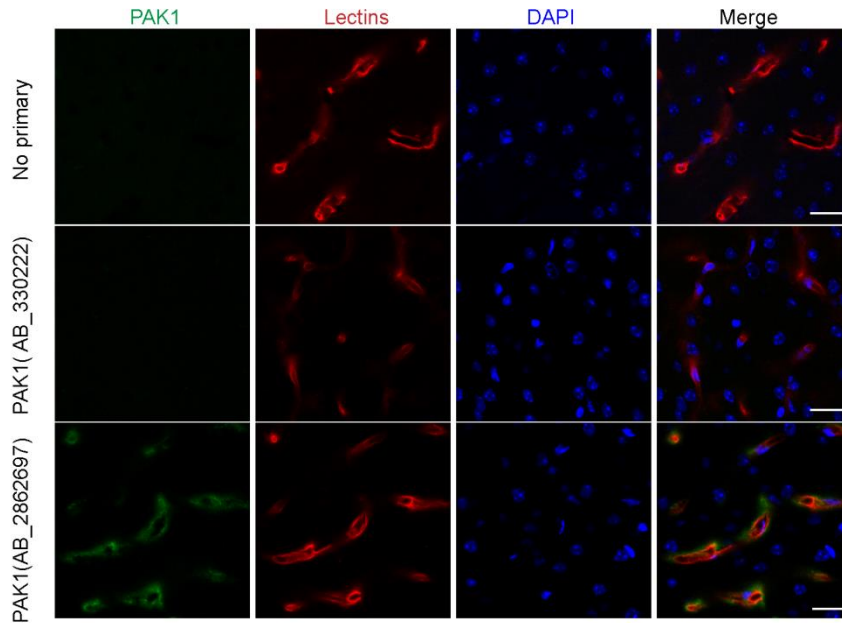

**Figure S1. Immunostaining by different PAK1 antibodies, Related to Figure 1.** No primary antibody was used as negative control. PAK1 (CST, Cat#2602; AB\_330222, 1:50) is invalidity in immunostaining, relatively PAK1 (Abclonal, Cat#A19608; AB\_2862697, 1:50) can effectively display PAK1 expression on microvessels. DyLight 594-conjugated lectins (1:200) were used to show microvessels. Scale bar = 20  $\mu$ m.

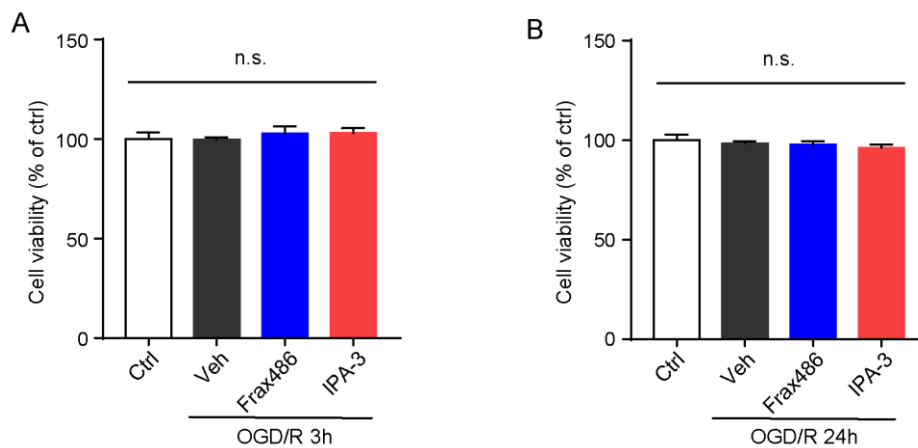

**Figure S2. Cell viability of bEnd.3 cells were not altered after OGD/R, Related to Figure 2.** Cell viability was measured by CCK-8 assay. OGD 2h and reoxygenation 3h (A) or 24h (B) didn't alter bEnd.3 cell survival, and neither did Frax486 or IPA-3 treatment. Data are expressed as mean  $\pm$  SEM (n=8).
